# Supplementary material
Source: publisher figshare collection journal article supplement (https://rs.figshare.com/ndownloader/files/12601790)
Supplement: Supplementary file 1 [file 12601790]

**Appendix S5.** Sampling scheme for generating random points in 3rd order GAMM analysis.

**Figure S3.** Comparison of time distributions (day of month and year) of empirical foraging locations (top) and randomly generated locations. Because FSLE values need to be time-matched, we assigned randomly generated dates to random points for each day in September between 2004 and 2015 to obtain a random representation across time.

**Figure S4.** Study area with sample migration track showing the 95% bounding box used to generate random points for the 3rd order resource selection analysis (solid line), and a second bounding box with a 50% larger extent for comparison (dashed line). Results of the 3rd order selection analysis for foraging location vs. random available remained unchanged when random points were sampled from a 50% larger bounding box. Neither Finite Size Lypanov Exponent nor its spatial mean, maximum or standard deviation influenced areas selected for foraging (p > 0.1 for each).
